# Supplementary material for: Investigation and development of photocathodes using polyaniline Encapsulated Ti3C2Tx MXene nanosheets for dye-sensitized solar cells
Source: Royal Society of Chemistry journal article supplement (doi:10.1039/d4nr01057d), 2024-01-01
Supplement: d4nr01057d1.pdf [file d4nr01057d1.pdf]

## SUPPLEMENTARY INFORMATION

### Investigation and Development of Photocathodes using Polyaniline Encapsulated $\text{Ti}_3\text{C}_2\text{T}_x$ MXene Nanosheets for Dye-sensitized Solar Cells

Suruthi Priya Nagalingam<sup>a</sup>, Saravanan Pandiaraj<sup>b</sup>, Abdullah. N Alodhayb<sup>c</sup> and Andrews Nirmala Grace<sup>a\*</sup>

<sup>a</sup> Centre for Nanotechnology Research, Vellore Institute of Technology, Vellore- 632014

<sup>b</sup> Department of Self-Development Skills, King Saud University, Riyadh, 11451, Saudi Arabia.

<sup>c</sup> Department of Physics and Astronomy, College of Science, King Saud University, Riyadh, 11451, Saudi Arabia.

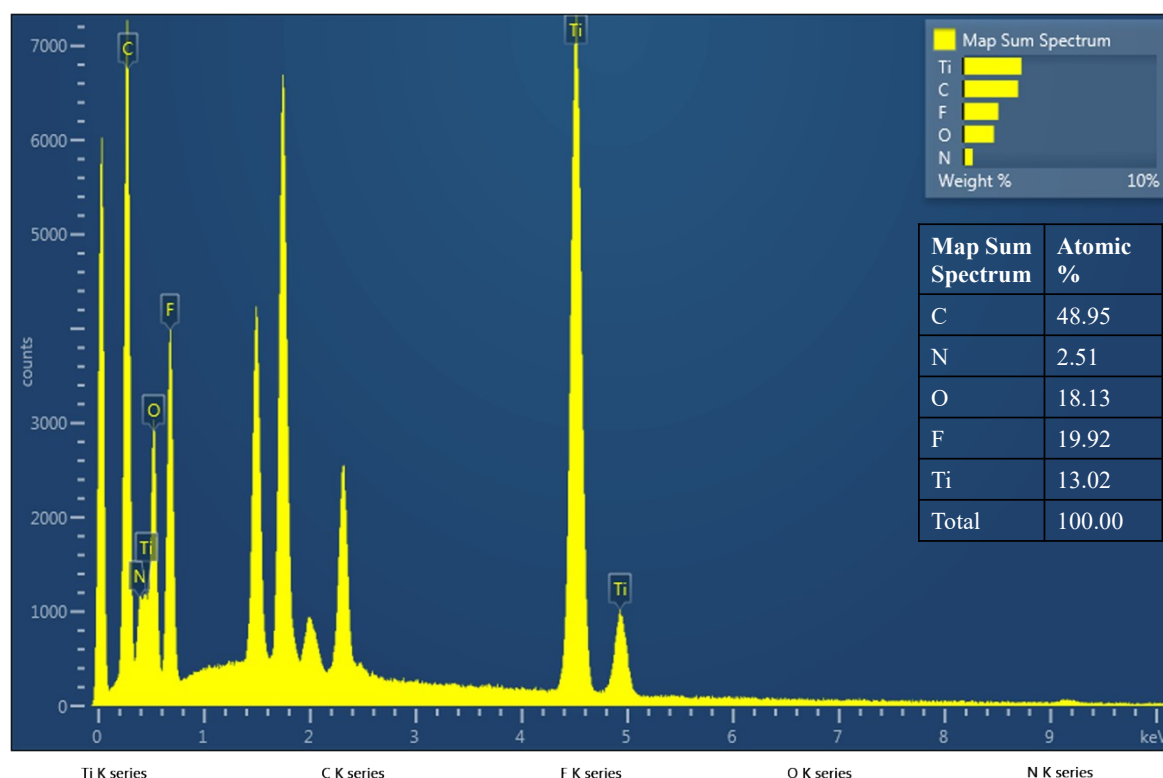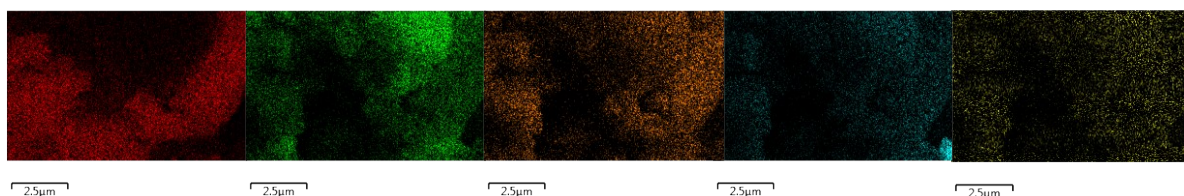

Fig. S1 EDS and elemental mapping of PANI-Ti<sub>3</sub>C<sub>2</sub>T<sub>x</sub> hybrid

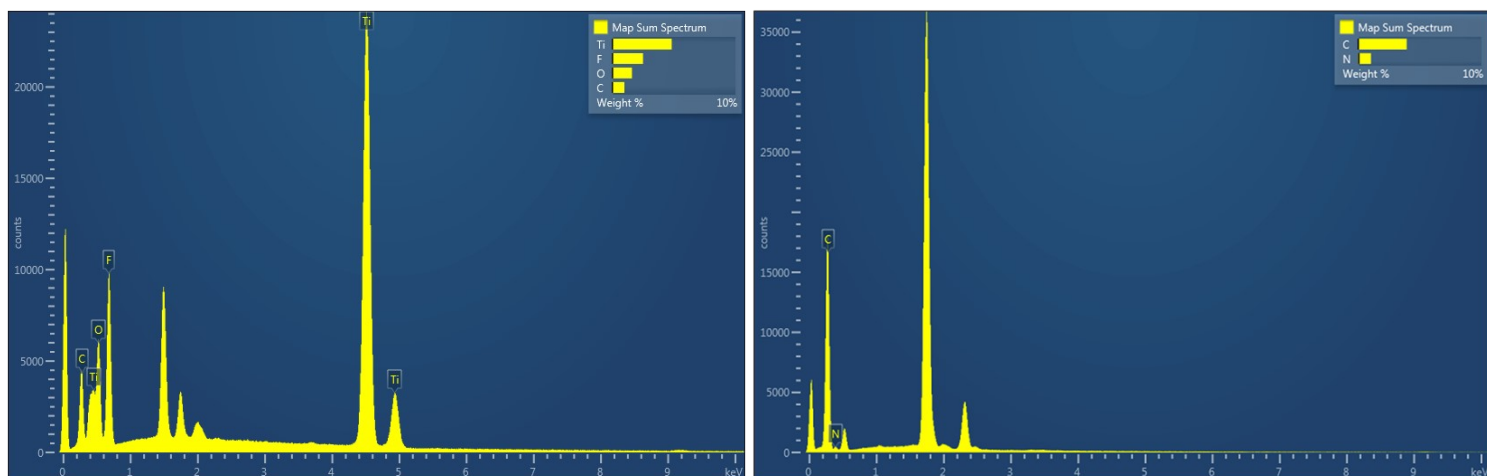

Fig. S2 EDS spectrum of pristine Ti<sub>3</sub>C<sub>2</sub>T<sub>x</sub> and PANI

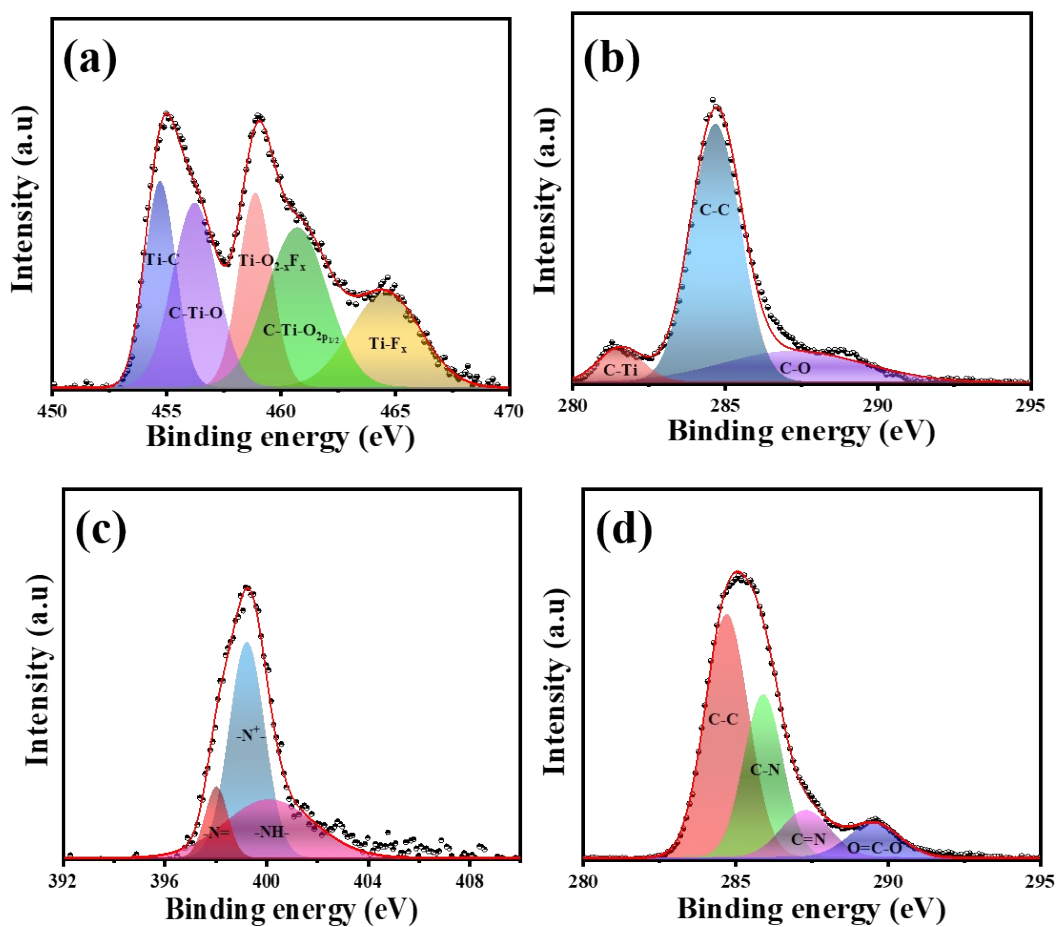

Fig. S3 XPS patterns of (a) and (b)  $Ti_3C_2T_x$  and (c) and (d) PANI

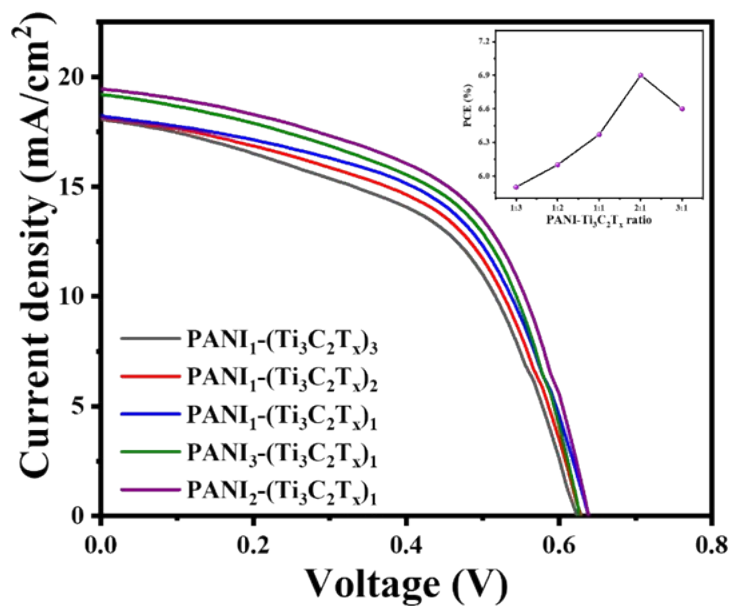

Fig. S4 Comparison I-V characteristics of PANI to  $Ti_3C_2T_x$  ratios

Table S1 Comparison table of the photovoltaic performance of PANI to  $Ti_3C_2T_x$  ratios

| PANI-<br>$Ti_3C_2T_x$<br>ratios | $V_{oc}$ (V) | $J_{sc}$ (mA/cm <sup>2</sup> ) | Fill factor | $\eta$     |
|---------------------------------|--------------|--------------------------------|-------------|------------|
| 1:3                             | 0.62         | 18.1                           | 52          | 5.9        |
| 1:2                             | 0.63         | 18.2                           | 54          | 6.1        |
| 1:1                             | 0.64         | 18.3                           | 55          | 6.4        |
| 2:1                             | <b>0.64</b>  | <b>19.4</b>                    | <b>55</b>   | <b>6.9</b> |
| 3:1                             | 0.63         | 19.2                           | 55          | 6.6        |

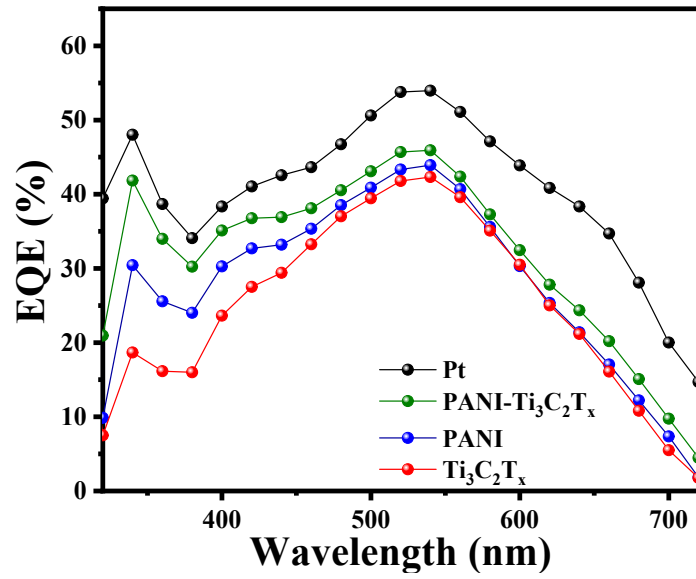

Fig. S5 EQE of DSSCs with various CEs

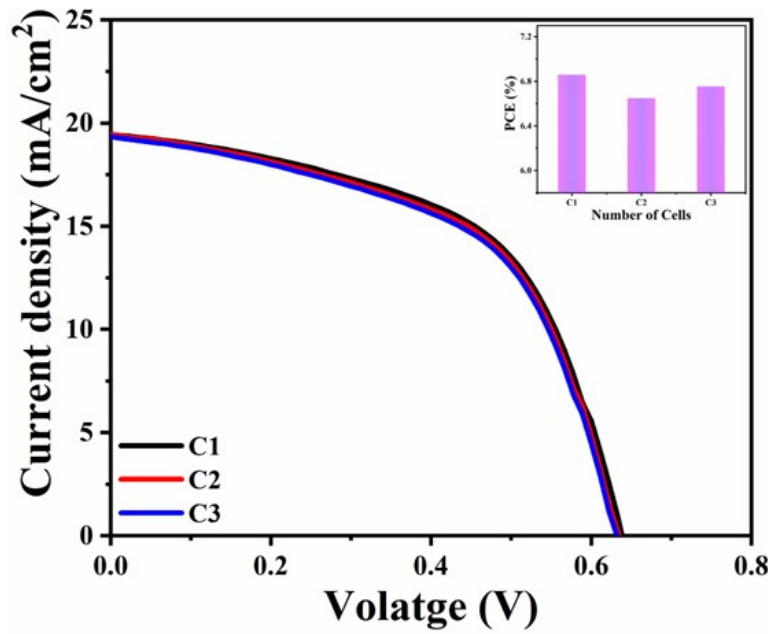

Fig. S6 Reproducibility test of DSSC fabricated with PANI-Ti<sub>3</sub>C<sub>2</sub>T<sub>x</sub> CE
